# Supplementary material
Source: PubMed Central journal article supplement (PMC8188328)
Supplement: mmc1.pdf [file mmc1.pdf]

## Supplemental Table 1

### Device Diagnostic Data for Virtual Visit Group

| Subject ID | Device Company | Thoracic Impedance (0: stable, 1: increasing, 2: decreasing) | Activity (0: <1hr, 1: 1-2hrs, 2: 2-4hrs daily, 3: >4hrs daily) | Device Fluid Diagnostics    |
|------------|----------------|--------------------------------------------------------------|----------------------------------------------------------------|-----------------------------|
| 1          | Medtronic      | 0                                                            | 1                                                              | Optivol< 40                 |
| 2          | Medtronic      | 1                                                            | 0                                                              | Optivol< 40                 |
| 3          | Medtronic      | 0                                                            | 1                                                              | Optivol=80, rising          |
| 4          | Bos Sci        | 0                                                            | 1                                                              | HeartLogic=0                |
| 5          | Medtronic      | 1                                                            | 0                                                              | Optivol< 40                 |
| 6          | Bos Sci        | 1                                                            | 2                                                              | HeartLogic=0                |
| 7          | Bos Sci        | 0                                                            | 0                                                              | HeartLogic=7                |
| 8          | Medtronic      | 0                                                            | 3                                                              | Optivol< 40                 |
| 9          | Medtronic      | 0                                                            | 3                                                              | Optivol< 40                 |
| 10         | Bos Sci        | N/A                                                          | 0                                                              | N/A                         |
| 11         | Bos Sci        | N/A                                                          | 2                                                              | N/A                         |
| 12         | Bos Sci        | 0                                                            | 0                                                              | HeartLogic=0                |
| 13         | Medtronic      | N/A                                                          | N/A                                                            | N/A*                        |
| 14         | Medtronic      | 0                                                            | 1                                                              | Optivol< 40                 |
| 15         | Bos Sci        | 2                                                            | 0                                                              | HeartLogic=2                |
| 16         | Medtronic      | 0                                                            | 0                                                              | Optivol< 40, but increasing |
| 17         | Medtronic      | 1                                                            | 0                                                              | Optivol< 40                 |
| 18         | Bos Sci        | 0                                                            | 2                                                              | HeartLogic=0                |
| 19         | Bos Sci        | 0                                                            | 0                                                              | HeartLogic=6                |
| 20         | Biotronik      | 1                                                            | 1                                                              | N/A**                       |
| 21         | Bos Sci        | 0                                                            | 0                                                              | HeartLogic=0                |
| 22         | Medtronic      | 1                                                            | 3                                                              | Optivol< 40                 |
| 23         | Bos Sci        | 1                                                            | 1                                                              | HeartLogic=0                |
| 24         | Medtronic      | 2                                                            | 3                                                              | Optivol< 40                 |
| 25         | Medtronic      | 0                                                            | 1                                                              | Optivol< 40                 |
| 26         | Medtronic      | 1                                                            | 0                                                              | Optivol< 40                 |
| 27         | Medtronic      | 0                                                            | 1                                                              | Optivol=40, but rising      |
| 28         | Bos Sci        | N/A                                                          | 1                                                              | N/A                         |
| 29         | Bos Sci        | N/A                                                          | 1                                                              | N/A                         |
| 30         | Medtronic      | 0                                                            | 3                                                              | Optivol< 40                 |

|    |           |     |     |                 |
|----|-----------|-----|-----|-----------------|
| 31 | Medtronic | N/A | N/A | N/A***          |
| 32 | Bos Sci   | 0   | 0   | HeartLogic=1    |
| 33 | Abbott    | 0   | 1   | N/A             |
| 34 | Biotronik | 0   | 1   | N/A             |
| 35 | Medtronic | 0   | 0   | Optivol< 40     |
| 36 | Bos Sci   | 0   | 1   | HeartLogic=0    |
| 37 | Bos Sci   | 1   | 1   | HeartLogic=5    |
| 38 | Bos Sci   | N/A | N/A | N/A*            |
| 39 | Bos Sci   | 1   | 1   | HeartLogic=16   |
| 40 | Medtronic | 0   | 1   | Optivol< 40     |
| 41 | Bos Sci   | 0   | 1   | 5 (Heart Logic) |
| 42 | Bos Sci   | N/A | 2   | N/A             |
| 43 | Medtronic | 0   | 3   | Optivol< 40     |

\*Patient did not have remotes set up

\*\*Fluctuations in thoracic impedance

\*\*\*Device diagnostics followed with local cardiologist
